# Supplementary material for: Seismogenic potential and tsunami threat of the strike-slip Carboneras fault in the western Mediterranean from physics-based earthquake simulations
Source: Copernicus journal article supplement (doi:10.5194/nhess-23-2031-2023), 2023-06-06
Supplement: Supplementary file 1 [file nhess-23-2031-2023-supplement.pdf]

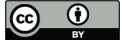

*Supplement of*

**Seismogenic potential and tsunami threat of the strike-slip  
Carboneras fault in the western Mediterranean from  
physics-based earthquake simulations**

**José A. Álvarez-Gómez et al.**

*Correspondence to:* José A. Álvarez-Gómez ([jaag@ucm.es](mailto:jaag@ucm.es))

The copyright of individual parts of the supplement might differ from the article licence.

Table S1. Input parameters assigned to the fault sections modeled for the Eastern Betic Shear Zone (EBSZ). See Herrero-Barbero et al. (2021) for more detailed data about the criteria followed to assign the mean, maximum and minimum values according to references. R: rake; SR: slip rate.

| Fault name                   | Fault section name                           | ID    | Rake   | Deviation  | Slip rate | Deviation        | References                                                                                                                                                                                                  |
|------------------------------|----------------------------------------------|-------|--------|------------|-----------|------------------|-------------------------------------------------------------------------------------------------------------------------------------------------------------------------------------------------------------|
| Alhama de Murcia Fault (AMF) | Goñar-Lorca                                  | AMF-1 | 20     | 0 - 40     | 1.10      | 0.50 - 1.70      | R from slickenlines measured by Martinez-Diaz (1998). SR based on trenches (Ferrater et al., 2017; Ortuño et al., 2012)                                                                                     |
|                              | Lorca-Totana                                 | AMF-2 | 39     | 19 - 59    | 0.90      | 0.80 - 1.00      | R from 2011 Lorca eq.(Martinez-Diaz, Bejar-Pizarro, et al., 2012) and structural analysis by Alonso-Henar et al. (2020). SR from trenching and morphotectonic analysis (Ferrater et al., 2016, 2017)        |
|                              | Totana-Alhama de Murcia                      | AMF-3 | 42     | 25 - 58    | 0.20      | 0.07 - 0.32      | Data inferred from AMF-4                                                                                                                                                                                    |
|                              | Alhama de Murcia-Alcantarilla                | AMF-4 | 42     | 25 - 58    | 0.20      | 0.07 - 0.32      | SR and R from cross-section restorations (Herrero-Barbero et al., 2020). Min.SR from Silva et al. (2003).                                                                                                   |
| Carboneras Fault (CF)        | Southern Carboneras (offshore)               | CF-1  | 10     | 0 - 20     | 1.20      | 1.10 - 1.30      | Data from deflected submarine channels in CF-1 (Moreno, 2011) and onshore fluvial channels in CF-2 (Moreno et al., 2015). Max. SR based on GPS data of Echeverria et al. (2015)                             |
|                              | Northern Carboneras (offshore-onshore)       | CF-2  | 10     | 0 - 20     | 1.20      | 1.10 - 1.30      |                                                                                                                                                                                                             |
| Palomares Fault (PF)         | Southern Palomares-Arteal Faults             | PF-1  | -5 (0) | (-25) - 15 | 0.04      | 0.01 - 0.08      | Data measured by Booth-Rea et al. (2004), comparing fluvial deposits and paleochannels in PF-1. R in PF-2 is consistent with the moment tensor of a recent $M_W$ 3.6 event (IGN, 2019)                      |
|                              | Northern Palomares (S <sup>a</sup> Almenara) | PF-2  | 15     | 0 - 35     | 0.04      | 0.01 - 0.08      |                                                                                                                                                                                                             |
|                              | Northern Palomares-Hinojar Faults            | PF-3  | 15     | 0 - 35     | 0.10      | 0.04 - 0.16      | R is inferred from PF-2 and SR is based on comparison between PF-3 and LTF-1                                                                                                                                |
| Los Tollos Fault (LTF)       | Los Tollos Fault                             | LTF-1 | 15     | 0 - 35     | 0.16      | 0.06 - 0.25      | R and SR obtained through trenching by Insua-Arevalo et al. (2015).                                                                                                                                         |
| Carrascoy Fault (CAF)        | SW Carrascoy-Algezares-Casas Nuevas          | CAF-1 | 90     | 75 - 90    | 0.37      | 0.29 - 0.45      | R and SR estimated from trenches by Martin-Banda et al. (2016). R is referred to the younger reverse branch.                                                                                                |
|                              | NE Carrascoy Fault                           | CAF-2 | 15     | 5 - 25     | 0.85      | 0.50 - 1.20      | Data from structural analysis (Martin-Banda et al., 2021; Sanz de Galdeano et al., 1998; Silva, 1994).                                                                                                      |
| Bajo Segura Fault (BSF)      | Hurchillo                                    | BSF-1 | 90     | 70 - 110   | 0.40      | 0.29 - 0.51(0.6) | SR estimations from Alfaro et al. (2012) using stratigraphic markers and assuming pure reverse. Note that GPS data from Borque et al. (2019) show $0.6 \pm 0.2$ mm/yr of shortening for the entire BSF zone |
|                              | Benejuzar                                    | BSF-2 | 90     | 70 - 110   | 0.27      | 0.20 - 0.34      |                                                                                                                                                                                                             |
|                              | Guardamar                                    | BSF-3 | 90     | 70 - 110   | 0.20      | 0.15 - 0.25      |                                                                                                                                                                                                             |
|                              | Bajo Segura Offshore                         | BSF-4 | 90     | 70 - 110   | 0.20      | 0.15 - 0.25      | For R, see seismic profiles from Alfaro et al. (2012) and Perea et al. (2012). SR is inferred from BSF-4                                                                                                    |

Note: Rake is defined using the Aki and Richards (1980) convention (right-hand rule). If uncertainties cannot be quantified, a default value of  $\pm 20^\circ$  is used.

## References:

- Alfaro, P., Bartolomé, R., Borque, M. J., Estévez, A., García-Mayordomo, J., García-Tortosa, F. J., Gil, A. J., Gràcia, E., Iacono, C. L., & Perea, H. (2012). The Bajo Segura Fault Zone: Active blind thrusting in the Eastern Betic Cordillera (SE Spain). *Journal of Iberian Geology*, 38(1), 1. [https://doi.org/10.5209/rev\\_JIGE.2012.v38.n1.39217](https://doi.org/10.5209/rev_JIGE.2012.v38.n1.39217)
- Alonso-Henar, J., Fernandez, C., & Jesus Martinez-Diaz, J. (2020). Application of the analytic model of general triclinic transpression with oblique extrusion to an active deformation zone: The Alhama de Murcia Fault (SE Iberian Peninsula). *Journal of Structural Geology*, 130, 103924. <https://doi.org/10.1016/j.jsg.2019.103924>
- Booth-Rea, G., Azañón, J. M., Azor, A., & García-Dueñas, V. (2004). Influence of strike-slip fault segmentation on drainage evolution and topography. A case study: the Palomares Fault Zone (southeastern Betics, Spain). *Journal of Structural Geology*, 26(9), 1615-1632.
- Borque, M. J., Sánchez-Alzola, A., Martín-Rojas, I., Alfaro, P., Molina, S., Rosa-Cintas, S., Rodríguez-Caderot, G., de Lacy, C., García-Armenteros, J. A., Avilés, M., Herrera-Olmo, A., García-Tortosa, F. J., Estévez, A., & Gil, A. J. (2019). How Much Nubia-Eurasia Convergence Is Accommodated by the NE End of the Eastern Betic Shear Zone (SE Spain)? Constraints From GPS Velocities. *Tectonics*, 38(5), 1824-1839. <https://doi.org/10.1029/2018TC004970>
- Echeverria, A., Khazaradze, G., Asensio, E., & Masana, E. (2015). Geodetic evidence for continuing tectonic activity of the Carboneras fault (SE Spain). *Tectonophysics*, 663, 302-309. <https://doi.org/10.1016/j.tecto.2015.08.009>
- Ferrater, M., Ortuño, M., Masana, E., Martínez-Díaz, J. J., Pallàs, R., Perea, H., Baize, S., García-Meléndez, E., Echeverria, A., Rockwell, T., Sharp, W. D., & Arrowsmith, R. (2017). Lateral slip rate of Alhama de Murcia fault (SE Iberian Peninsula) based on a morphotectonic analysis: Comparison with paleoseismological data. *Quaternary International*, 451, 87-100. <https://doi.org/10.1016/j.quaint.2017.02.018>
- Ferrater, M., Ortuno, M., Masana, E., Pallas, R., Perea, H., Baize, S., Garcia-Melendez, E., Martinez-Diaz, J. J., Echeverria, A., Rockwell, T. K., Sharp, W. D., Medialdea, A., & Rhodes, E. J. (2016). Refining seismic parameters in low seismicity areas by 3D trenching: The Alhama de Murcia fault, SE Iberia. *Tectonophysics*, 680, 122-128. <https://doi.org/10.1016/j.tecto.2016.05.020>
- Herrero-Barbero, P., Álvarez-Gómez, J. A., Williams, C., Villamor, P., Insua-Arévalo, J. M., Alonso-Henar, J., & Martínez-Díaz, J. J. (2021). Physics-based earthquake simulations in slow-moving faults: a case study from the Eastern Betic Shear Zone (SE Iberian Peninsula). *Journal of Geophysical Research: Solid Earth*, 126(5), e2020JB021133. <https://doi.org/10.1029/2020JB021133>
- Herrero-Barbero, P., Alvarez-Gomez, J. A., Martinez-Diaz, J. J., & Klimowitz, J. (2020). Neogene Basin Inversion and Recent Slip Rate Distribution of the Northern Termination of the Alhama de Murcia Fault (Eastern Betic Shear Zone, SE Spain). *Tectonics*, 39(7), e2019TC005750. <https://doi.org/10.1029/2019TC005750>
- Arévalo, J. M. I., Mayordomo, J. G., Rincón, Á. S., Escudero, E. R., Banda, R. M., Gómez, J. A. Á., ... & Díaz, J. J. M. (2015). Paleoseismological evidence of Holocene activity of the Los Tollos Fault (Murcia, SE Spain): a lately formed Quaternary tectonic feature of the Eastern Betic Shear Zone. *Journal of Iberian Geology*, 41(3), 333-350.
- Martin-Banda, R., Garcia-Mayordomo, J., Insua-Arevalo, J. M., Salazar, A. E., Rodriguez-Escudero, E., Alvarez-Gomez, J. A., Medialdea, A., & Herrero, M. J. (2016). New insights on the seismogenic potential of the Eastern Betic Shear Zone (SE Iberia): Quaternary activity and paleoseismicity of the SW segment of the Carrascoy Fault Zone. *Tectonics*, 35(1), 55-75. <https://doi.org/10.1002/2015TC003997>

Martín-Banda, R., Insua-Arévalo, J. M., & García-Mayordomo, J. (2021). Slip rate variation during the last ~ 210 ka on a slow fault in a transpressive regime: the Carrascoy Fault (Eastern Betic Shear Zone, SE Spain). *Frontiers in Earth Science*, 8, 599608.

Martínez-Díaz, J. J., Bejar-Pizarro, M., Álvarez-Gómez, J. A., Mancilla, F. de L., Stich, D., Herrera, G., & Morales, J. (2012). Tectonic and seismic implications of an intersegment rupture: The damaging May 11th 2011 Mw 5.2 Lorca, Spain, earthquake. *Tectonophysics*, 546-547, 28-37. <https://doi.org/10.1016/j.tecto.2012.04.010>

Moreno, X. (2011). Neotectonic and paleoseismic onshore-offshore integrated study of the Carboneras Fault (eastern betics, SE Iberia) [Ph.D. Thesis]. Universitat de Barcelona.

Moreno, X., Masana, E., Pallàs, R., Gràcia, E., Rodés, Á., & Bordonau, J. (2015). Quaternary tectonic activity of the Carboneras Fault in the La Serrata range (SE Iberia): Geomorphological and chronological constraints. *Tectonophysics*, 663, 78-94. <https://doi.org/10.1016/j.tecto.2015.08.016>

Ortuño, María., Masana, Eulalia., García-Meléndez, Eduardo., Martínez-Díaz, José., Štěpančíková, Petra., Cunha, P. P., Sohbat, Reza., Canora, Carolina., Buylaert, J.-Pieter., & Murray, A. S. (2012). An exceptionally long paleoseismic record of a slow-moving fault: The Alhama de Murcia fault (Eastern Betic shear zone, Spain). *GSA Bulletin*, 124(9-10), 1474-1494. <https://doi.org/10.1130/B30558.1>

Perea, H., Gràcia, E., Alfaro, P., Bartolomé, R., Lo Iacono, C., Moreno, X., Masana, E., & EVENT-SHELF Team. (2012). Quaternary active tectonic structures in the offshore Bajo Segura basin (SE Iberian Peninsula – Mediterranean Sea). *Natural Hazards and Earth System Sciences*, 12(10), 3151-3168. <https://doi.org/10.5194/nhess-12-3151-2012>

Sanz de Galdeano, C., López-Garrido, A. C., & García-Tortosa, F. J. (1998). Nuevos datos para la estimación de los valores de levantamiento desde el Tortoniense Superior a la actualidad en la parte centrooccidental de la Sierra de Carrascoy (provincia de Murcia). *Geogaceta*, 23, 139-142.

Silva, P. G. (1994). Evolución geodinámica de la depresión del Guadalentín (Murcia) desde el mioceno superior hasta la actualidad: neotectónica y geomorfología [Ph.D. Thesis]. Universidad Complutense de Madrid.

Silva, P. G., Goy, J. L., Zazo, C., & Bardají, T. (2003). Fault-generated mountain fronts in southeast Spain: Geomorphologic assessment of tectonic and seismic activity. *Geomorphology*, 50(1), 203-225. [https://doi.org/10.1016/S0169-555X\(02\)00215-5](https://doi.org/10.1016/S0169-555X(02)00215-5)
